# Supplementary material
Source: PubMed Central journal article supplement (PMC522051)
Supplement: pnas_101_41_14731__1.pdf [file pnas_101_41_14731__1.pdf]

## Supporting Text

We first clustered the 1,799 displacements from a sequence of 1,800 video frames by the common sign of the polar angle  $\Delta\theta = \theta(k+1) - \theta(k)$ . We then calculated the sizes of the clusters,  $\text{Cls}_k$ , and the distance of each displacement between adjacent frames,  $d(k) = r(k)|\theta(k+1) - \theta(k)|$ . In some definitions, the corrected displacement,  $d^c(k)$ , was used in place of  $d(k)$ ;  $d^c(k) = d(k)$  if  $d(k)$  is larger than the change in the radius vector,  $|r(k+1) - r(k)|$ ; otherwise,  $d^c(k) = 0$ . The rotational coherence used in *Results* was

$$\sum_{\text{Cls} > 1} \sum_{k=1}^{\text{Cls}} \text{Cls}_k^2 \times |d^c(k)|.$$

We also replaced  $d^c(k)$  with  $d(k)$  and the weight  $\text{Cls}_k^2$  with  $\text{Cls}_k$  or what is minor of  $k$  and  $\text{Cls}_{k-k}$ .

Alternatively, instead of summing  $d(k)$  or  $d^c(k)$  over a cluster, we summed it over 1 s, which was reported to be the lifetime of a sliding complex (1). Nine variations of rotational coherence gave essentially the same result, as shown in Fig. 4E.

## References

1. Singer, P. T. & Wu, C.-W. (1988) *J. Biol. Chem.* **263**, 4208-4214.
